# Supplementary material for: Thermodynamically self-organized hole transport layers for high-efficiency inverted-planar perovskite solar cells
Source: Royal Society of Chemistry journal article supplement (doi:10.1039/c7nr03265j), 2017-01-01
Supplement: c7nr03265j1.pdf [file c7nr03265j1.pdf]

## Supporting Information

### Thermodynamically Self-organized Hole Transport Layer for High-Efficiency Inverted-Planar Perovskite Solar Cells

*Wanjung Kim, Soyeon Kim, Sung Uk Chai, Myung Sun Jung, Jae Keun Nam, Jung-Hyun Kim  
\* and Jong Hyeok Park \**

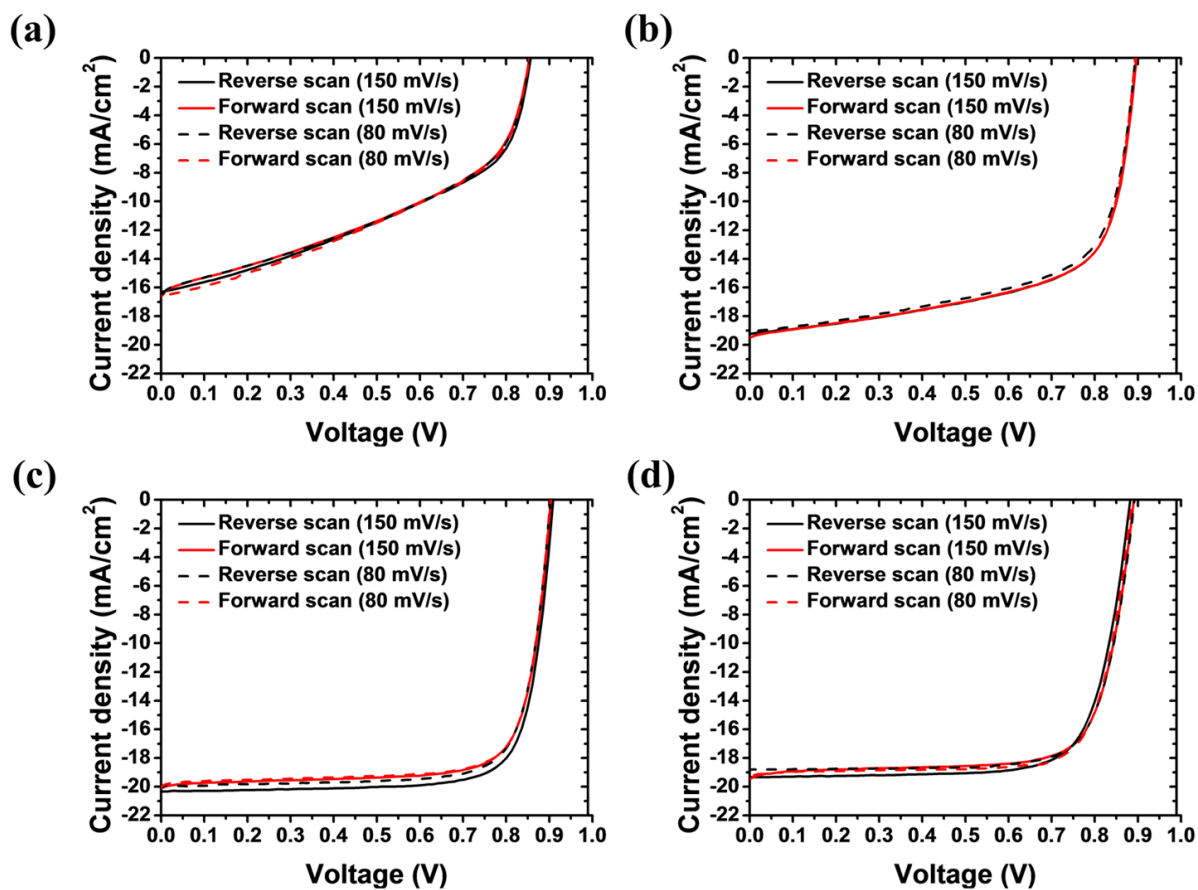

**Fig. S1.**  $J$ - $V$  curves measured by forward (from  $J_{\text{SC}}$  to  $V_{\text{OC}}$ , red) and reverse scans (from  $V_{\text{OC}}$  to  $J_{\text{SC}}$ , black) of the IP-PSCs containing various PEDOT:PSS films depending on the PSS/PEDOT ratio: (a) PEDOT1:PSS0.5, (b) PEDOT1:PSS2.5, (c) PEDOT1:PSS5.0 and (d) PEDOT1:PSS12.

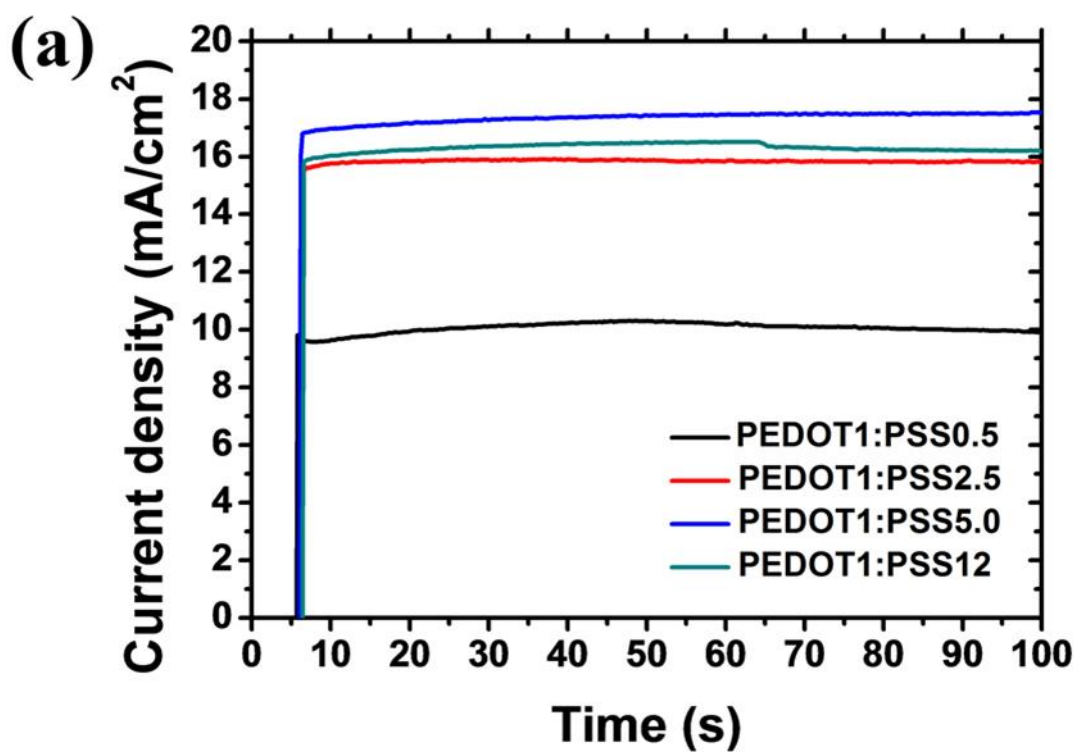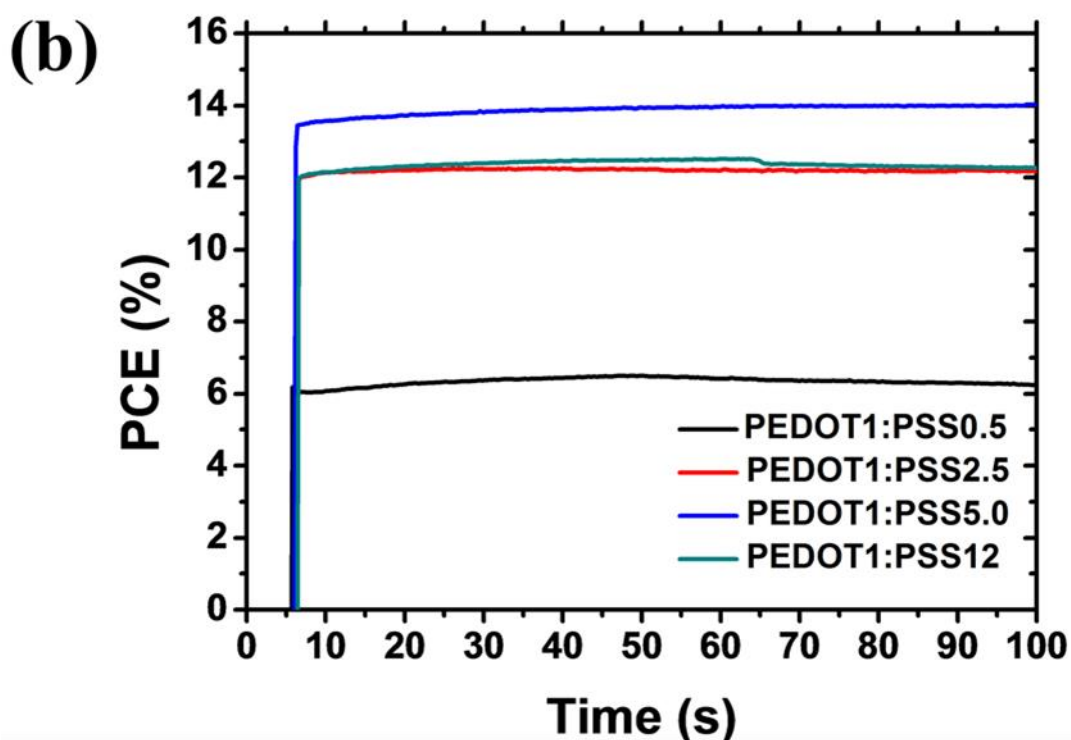

**Fig. S2.** (a) Photocurrent density and (b) power conversion efficiency as a function of time for the IP-PSC devices containing PEDOT:PSS films with controlled weight ratios. Data were obtained at the maximum voltage,  $V_{max}=0.63$  (PEDOT1:PSS0.5),  $0.77$  (PEDOT1:PSS2.5),  $0.8$  (PEDOT1:PSS5.0) and  $0.76$  (PEDOT1:PSS12), without pre-exposure under 1 sun illumination.

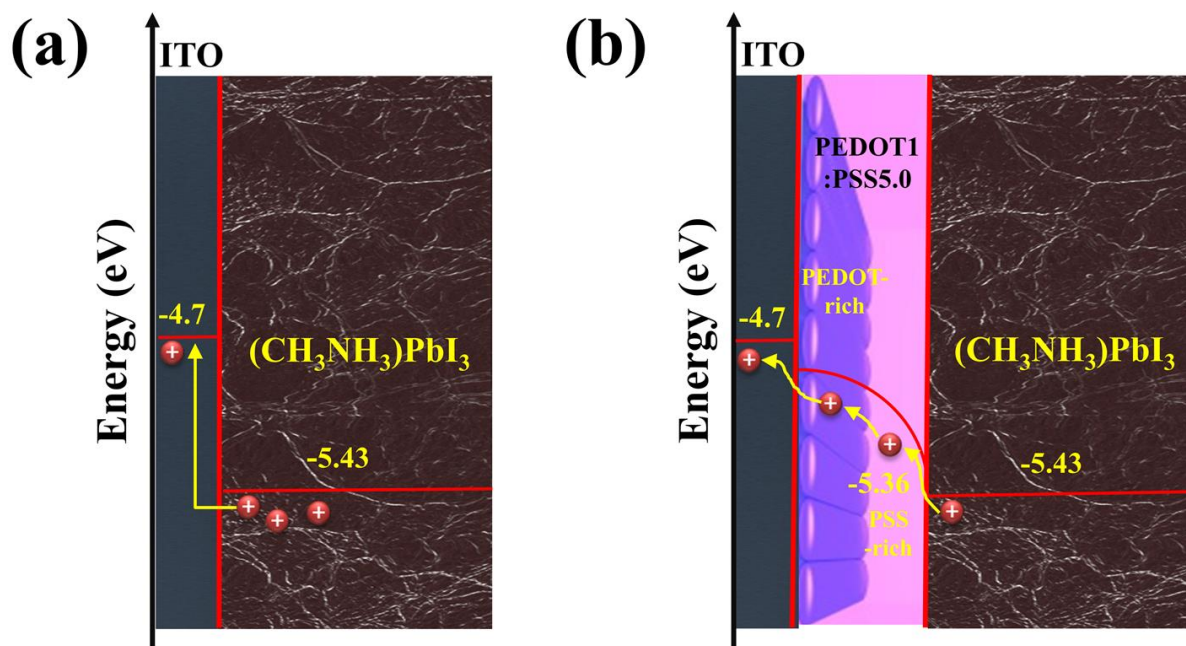

**Fig. S3.** (a) Schematic of a hole-transport process from perovskite layer to ITO electrode. (b) Schematic of a hole-transport process from perovskite layer to ITO electrode via PEDOT1:PSS5.0 layer.

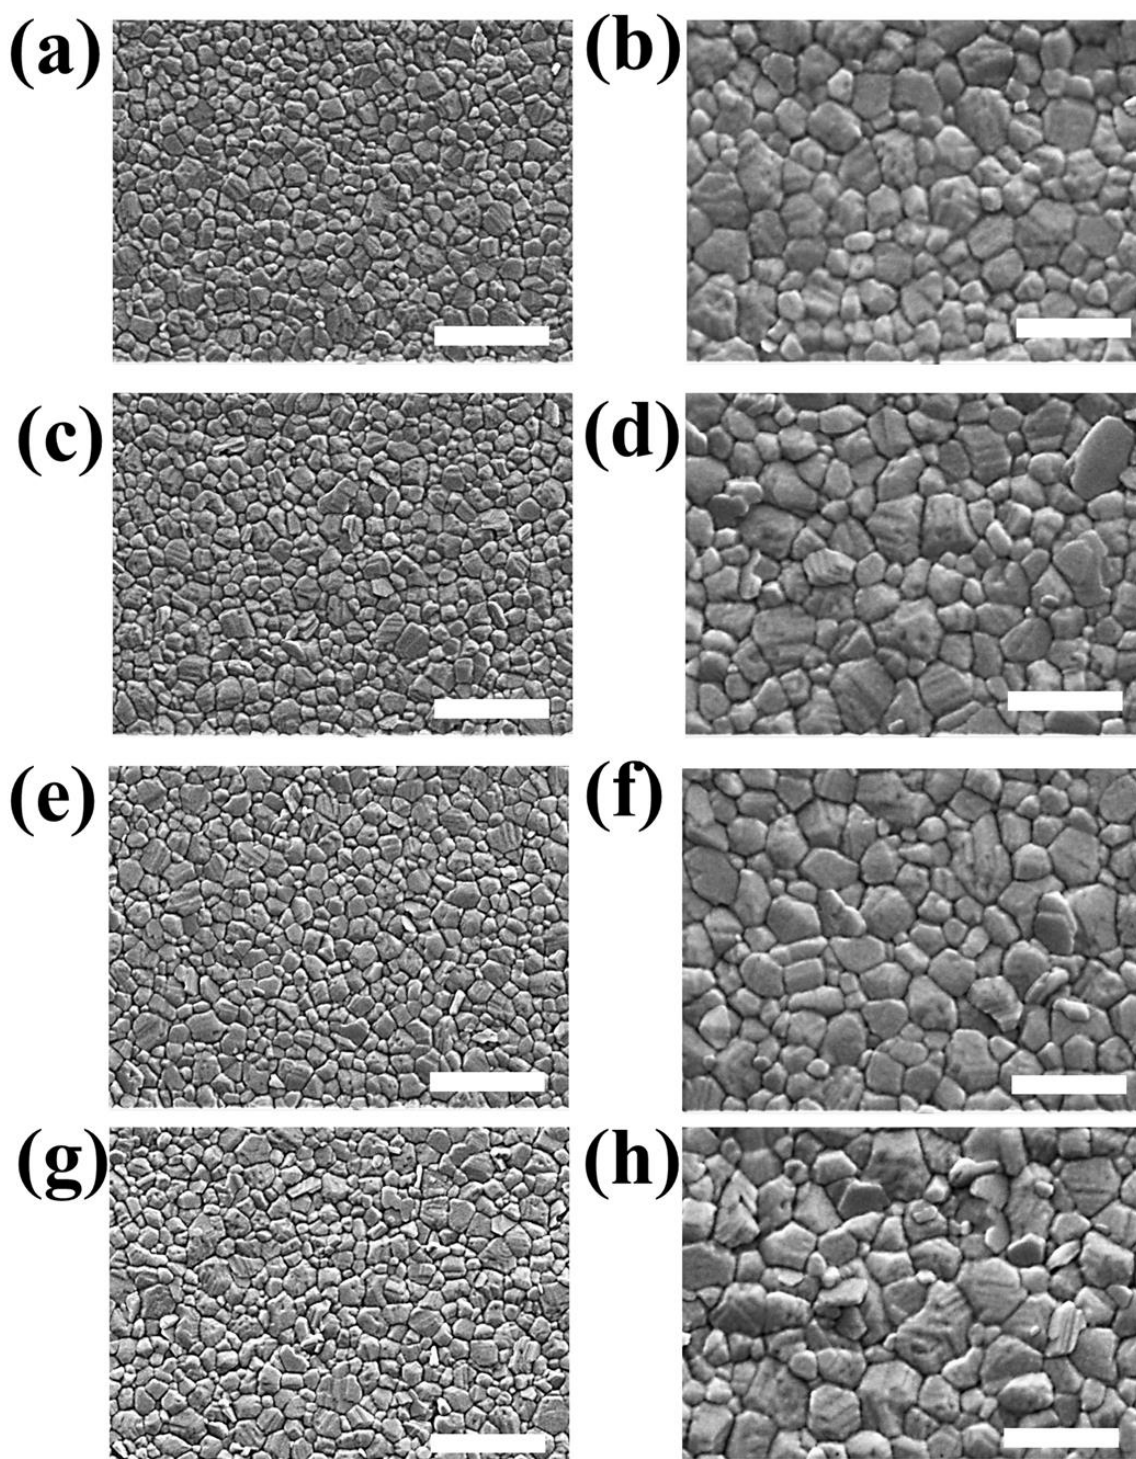

**Fig. S4.** Top-view SEM image of MAPbI<sub>3</sub> films on the various PEDOT:PSS layers depending on the PSS/PEDOT ratio: (a-b) PEDOT1:PSS0.5, (c-d) PEDOT1:PSS2.5, (e-f) PEDOT1:PSS5.0 and (g-h) PEDOT1:PSS12. Scale bar, 1000 nm (a, c, e, g) and 500 nm (b, d, f, h).

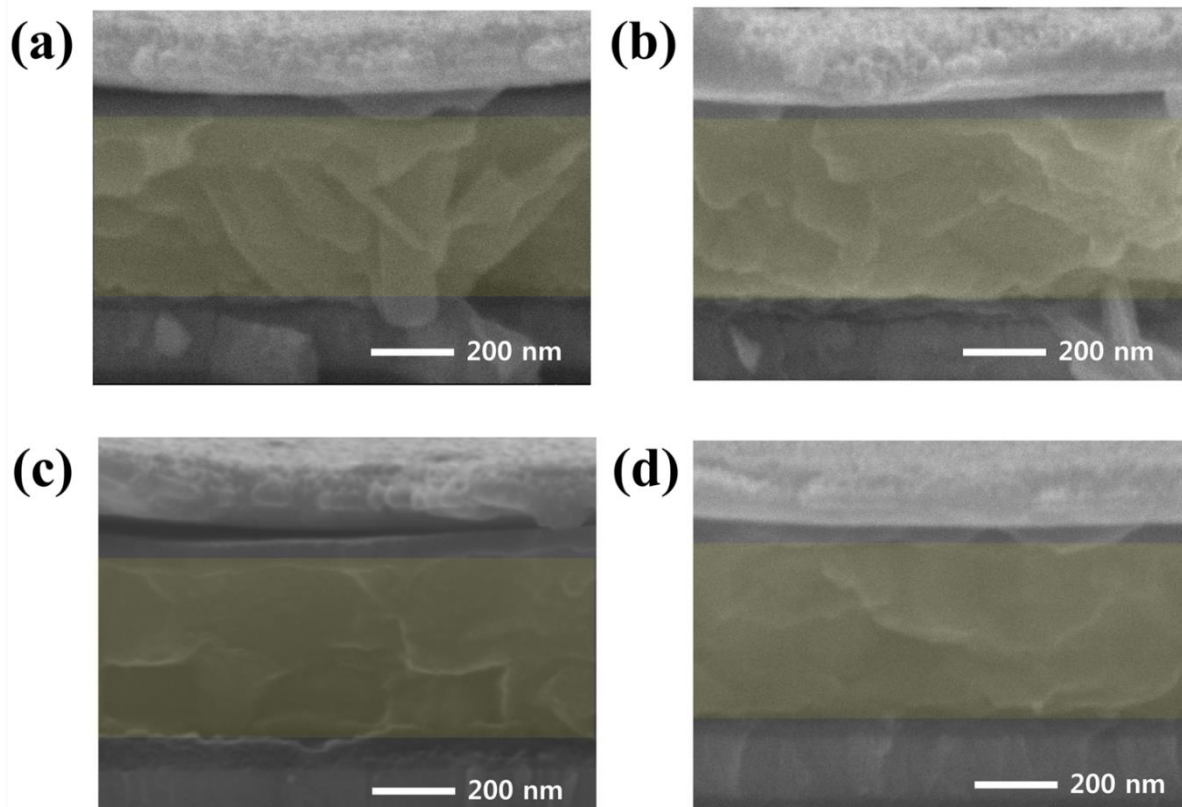

**Fig. S5.** Cross-sectional SEM images of the MAPbI<sub>3</sub> films on the various PEDOT:PSS layers depending on the PSS/PEDOT ratio: (a) PEDOT1:PSS0.5, (b) PEDOT1:PSS2.5, (c) PEDOT1:PSS5.0 and (d) PEDOT1:PSS12.

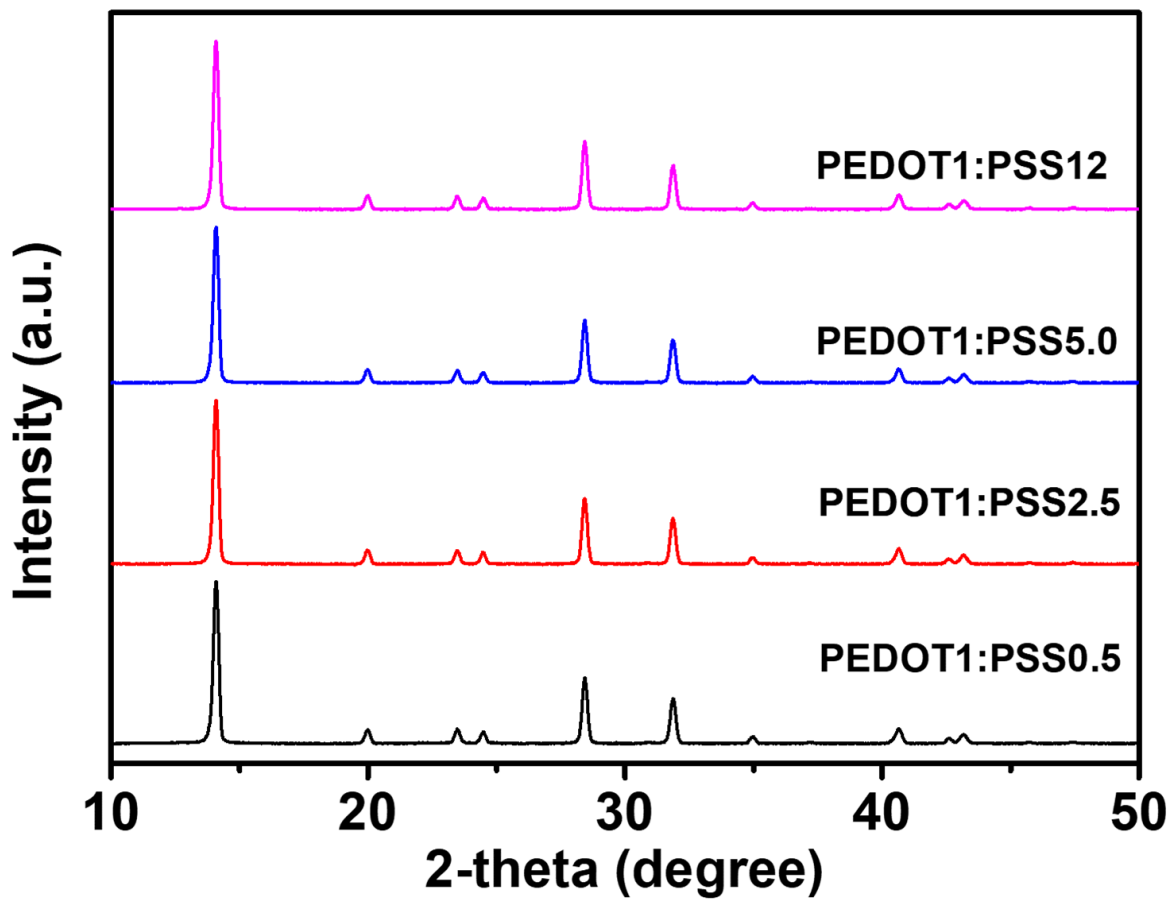

**Fig. S6.** XRD patterns of MAPbI<sub>3</sub> films on the various PEDOT:PSS layers depending on the PSS/PEDOT ratio

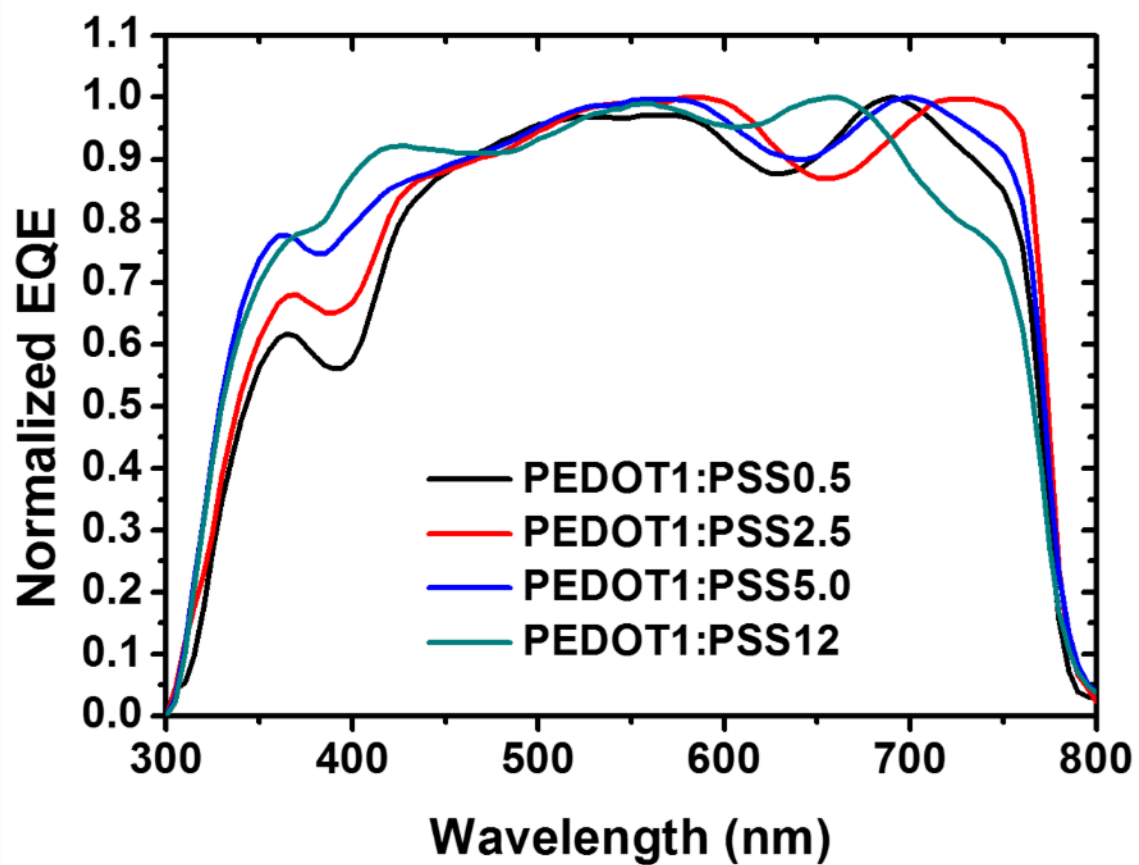

**Fig. S7.** Normalized EQE spectra of the IP-PSCs containing various PEDOT:PSS layers depending on the PSS/PEDOT ratio.
